# Supplementary material
Source: publisher figshare collection journal article supplement (https://acs.figshare.com/ndownloader/files/24607069)
Supplement: Supplementary file 1 [file 24607069]

## Supporting Information

### Three-Dimensional Inverse Opal TiO<sub>2</sub> Coatings to Enable the Gliding of Viscous Oils

Lacey D. Douglas,<sup>1,2</sup> Thomas E. O'Loughlin,<sup>1,2</sup> Cody J. Chalker,<sup>1,2</sup> Nicholas Cool,<sup>1,2</sup> Subodh Gupta,<sup>3</sup> James D. Batteas,<sup>1,2</sup> Sarbajit Banerjee\*,<sup>1,2</sup>

<sup>1</sup>Department of Chemistry, Texas A&M University, College Station, TX 77842-3012, USA

<sup>2</sup>Department of Materials Science and Engineering, Texas A&M University, College Station, TX 77843-3003, USA

<sup>3</sup>Cenovus Energy Inc., 225 6 Ave SW, Calgary, AB T2P 0M5, Canada

\*Email: banerjee@chem.tamu.edu

**Video S1.** The rapid gliding of heavy oil off of the 3D inverse opal titania coating. The coating was prepared using a 1:1 (v/v) of TiO<sub>2</sub>:PS colloidal dispersions and further functionalized with PFOPA.

**Video S2.** Heavy oil on an unfunctionalized steel substrate.

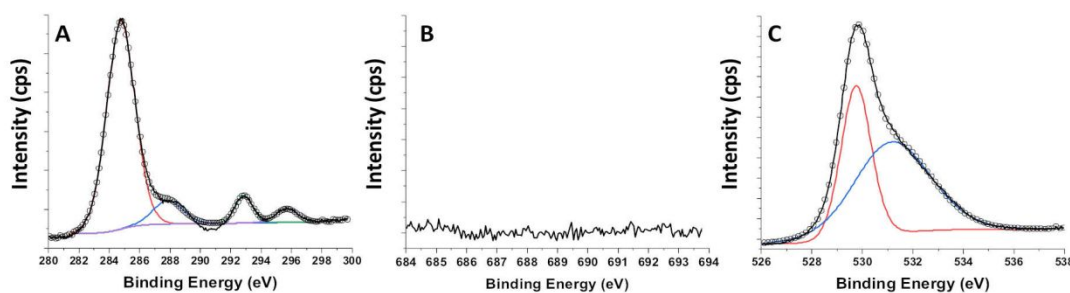

**Figure S1.** XPS spectra of 1500 nm TiO<sub>2</sub> particles acquired in (A) C 1s (red: adventitious C, blue: K<sup>+</sup> 2p<sub>3/2</sub>, teal: K<sup>+</sup> 2p<sub>1/2</sub>, pink: O-C/O-C=O) (B) F 1s and (C) O 1s (red: lattice O, blue: Ti-OH) regions.

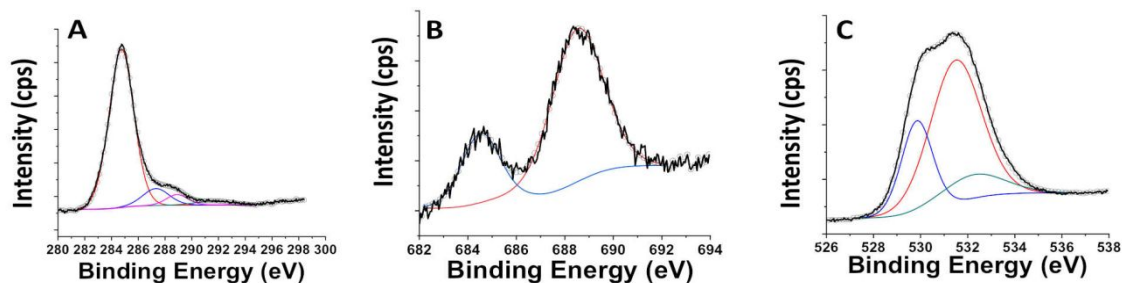

**Figure S2.** XPS spectra of PFOPA acquired in (A) C 1s (red: C-H/C-C, teal:  $-\text{CF}_2\text{-CH}_2\text{-}$ , pink: O-C/O-C=O, blue: C-P/ $-\text{CH}_2\text{-CF}_2\text{-}$ ) (B) F 1s (red:  $-\text{CF}_2\text{-CF}_3$ , blue: F<sup>-</sup>) and (C) O 1s (red: P=O, blue: P-O, teal: P-OH) regions.
